# Supplementary material
Source: MDPI journal article supplement (https://www.mdpi.com/2079-6412/13/2/466)
Supplement: s1 [file s1]

**Table S1.** Pairwise comparisons to vertical height loss of hemispheres.

| Dental restorative material X Finishing procedure X Staining | Dental restorative material X Finishing procedure X Staining | Mean Difference        | Standard Error | df | Bonferroni Sig. |
|--------------------------------------------------------------|--------------------------------------------------------------|------------------------|----------------|----|-----------------|
| [5Y-TZP] X [No] X [Without staining]                         | 5Y-TZP] X [No] X [Staining]                                  | 64.2000                | 26.86488       | 1  | 1.000           |
| [5Y-TZP] X [No] X [Without staining]                         | [5Y-TZP] X [Glazing] X [Without staining]                    | 65.6000                | 26.86488       | 1  | 1.000           |
| [5Y-TZP] X [No] X [Without staining]                         | [5Y-TZP] X [Polishing] X [Without staining]                  | 144.9000 <sup>a</sup>  | 26.86488       | 1  | .000            |
| [5Y-TZP] X [Glazing] X [Without staining]                    | [5Y-TZP] X [Polishing] X [Without staining]                  | 33.4000                | 26.86488       | 1  | 1.000           |
| [5Y-TZP] X [No] X [Without staining]                         | [MCR] X [No] X [Without staining]                            | 290.2000 <sup>a</sup>  | 26.86488       | 1  | .000            |
| [5Y-TZP] X [No] X [Without staining]                         | [LC] X [No] X [Without staining]                             | 278.7000 <sup>a</sup>  | 26.86488       | 1  | .000            |
| [5Y-TZP] X [No] X [Without staining]                         | [LD] X [No] X [Without staining]                             | 278.2000 <sup>a</sup>  | 26.86488       | 1  | .000            |
| [5Y-TZP] X [Glazing] X [Without staining]                    | [MCR] X [Glazing] X [Without staining]                       | 250.6000 <sup>a</sup>  | 26.86488       | 1  | .000            |
| [5Y-TZP] X [Glazing] X [Without staining]                    | [LC] X [Glazing] X [Without staining]                        | 228.1000 <sup>a</sup>  | 26.86488       | 1  | .000            |
| [5Y-TZP] X [Glazing] X [Without staining]                    | [LD] X [Glazing] X [Without staining]                        | 108.1000 <sup>a</sup>  | 26.86488       | 1  | .016            |
| [5Y-TZP] X [Polishing] X [Without staining]                  | [MCR] X [Polishing] X [Without staining]                     | 361.2000 <sup>a</sup>  | 26.86488       | 1  | .000            |
| [5Y-TZP] X [Polishing] X [Without staining]                  | [LC] X [Polishing] X [Without staining]                      | 350.5000 <sup>a</sup>  | 26.86488       | 1  | .000            |
| [5Y-TZP] X [Polishing] X [Without staining]                  | [LD] X [Polishing] X [Without staining]                      | 277.8000 <sup>a</sup>  | 26.86488       | 1  | .000            |
| [5Y-TZP] X [No] X [Staining]                                 | [5Y-TZP] X [Glazing] X [Staining]                            | 47.3000                | 26.86488       | 1  | 1.000           |
| [5Y-TZP] X [No] X [Staining]                                 | [5Y-TZP] X [Polishing] X [Staining]                          | 155.1000 <sup>a</sup>  | 26.86488       | 1  | .000            |
| [5Y-TZP] X [Glazing] X [Staining]                            | [5Y-TZP] X [Polishing] X [Staining]                          | 107.8000 <sup>a</sup>  | 26.86488       | 1  | .017            |
| [5Y-TZP] X [No] X [Staining]                                 | [MCR] X [No] X [Staining]                                    | 347.6000 <sup>a</sup>  | 26.86488       | 1  | .000            |
| [5Y-TZP] X [No] X [Staining]                                 | [LC] X [No] X [Staining]                                     | 362.5000 <sup>a</sup>  | 26.86488       | 1  | .000            |
| [5Y-TZP] X [No] X [Staining]                                 | [LD] X [No] X [Staining]                                     | 281.5000 <sup>a</sup>  | 26.86488       | 1  | .000            |
| [5Y-TZP] X [Glazing] X [Staining]                            | [MCR] X [Glazing] X [Staining]                               | 333.8000 <sup>a</sup>  | 26.86488       | 1  | .000            |
| [5Y-TZP] X [Glazing] X [Staining]                            | [LC] X [Glazing] X [Staining]                                | 394.6000 <sup>a</sup>  | 26.86488       | 1  | .000            |
| [5Y-TZP] X [Glazing] X [Staining]                            | [LD] X [Glazing] X [Staining]                                | 200.5000 <sup>a</sup>  | 26.86488       | 1  | .000            |
| [5Y-TZP] X [Polishing] X [Staining]                          | [MCR] X [Polishing] X [Staining]                             | 286.8000 <sup>a</sup>  | 26.86488       | 1  | .000            |
| [5Y-TZP] X [Polishing] X [Staining]                          | [LC] X [Polishing] X [Staining]                              | 286.8000 <sup>a</sup>  | 26.86488       | 1  | .000            |
| [5Y-TZP] X [Polishing] X [Staining]                          | [LD] X [Polishing] X [Staining]                              | 259.5000 <sup>a</sup>  | 26.86488       | 1  | .000            |
| [MCR] X [No] X [Without staining]                            | [MCR] X [No] X [Without staining]                            | 121.6000 <sup>a</sup>  | 26.86488       | 1  | .002            |
| [MCR] X [No] X [Without staining]                            | [MCR] X [Glazing] X [Without staining]                       | 26.0000                | 26.86488       | 1  | 1.000           |
| [MCR] X [No] X [Without staining]                            | [MCR] X [Polishing] X [Without staining]                     | 26.0000                | 26.86488       | 1  | 1.000           |
| [MCR] X [Glazing] X [Without staining]                       | [MCR] X [Polishing] X [Without staining]                     | 129.1000 <sup>a</sup>  | 26.86488       | 1  | .000            |
| [MCR] X [No] X [Without staining]                            | [5Y-TZP] X [No] X [Without staining]                         | -290.2000 <sup>a</sup> | 26.86488       | 1  | .000            |

|                                          |                                         |                        |          |   |       |
|------------------------------------------|-----------------------------------------|------------------------|----------|---|-------|
| [MCR] X [No] X [Without staining]        | [LC] X [No] X [Without staining]        | -11.5000               | 26.86488 | 1 | 1.000 |
| [MCR] X [No] X [Without staining]        | [LD] X [No] X [Without staining]        | -12.0000               | 26.86488 | 1 | 1.000 |
| [MCR] X [Glazing] X [Without staining]   | [LC] X [Glazing] X [Without staining]   | -22.5000               | 26.86488 | 1 | 1.000 |
| [MCR] X [Glazing] X [Without staining]   | [LD] X [Glazing] X [Without staining]   | -142.5000 <sup>a</sup> | 26.86488 | 1 | .000  |
| [MCR] X [Polishing] X [Without staining] | [LC] X [Polishing] X [Without staining] | -10.7000               | 26.86488 | 1 | 1.000 |
| [MCR] X [Polishing] X [Without staining] | [LD] X [Polishing] X [Without staining] | -83.4000               | 26.86488 | 1 | .526  |
| [MCR] X [No] X [Staining]                | [MCR] X [Glazing] X [Staining]          | 33.5000                | 26.86488 | 1 | 1.000 |
| [MCR] X [No] X [Staining]                | [MCR] X [Polishing] X [Staining]        | 94.3000                | 26.86488 | 1 | .124  |
| [MCR] X [Glazing] X [Staining]           | [MCR] X [Polishing] X [Staining]        | 60.8000                | 26.86488 | 1 | 1.000 |
| [MCR] X [No] X [Staining]                | [5Y-TZP] X [No] X [Staining]            | -347.6000 <sup>a</sup> | 26.86488 | 1 | .000  |
| [MCR] X [No] X [Staining]                | [LC] X [No] X [Staining]                | 14.9000                | 26.86488 | 1 | 1.000 |
| [MCR] X [No] X [Staining]                | [LD] X [No] X [Staining]                | -66.1000               | 26.86488 | 1 | 1.000 |
| [MCR] X [Glazing] X [Staining]           | [LC] X [Glazing] X [Staining]           | 60.8000                | 26.86488 | 1 | 1.000 |
| [MCR] X [Glazing] X [Staining]           | [LD] X [Glazing] X [Staining]           | -133.3000 <sup>a</sup> | 26.86488 | 1 | .000  |
| [MCR] X [Polishing] X [Staining]         | [LC] X [Polishing] X [Staining]         | .0000                  | 26.86488 | 1 | 1.000 |
| [MCR] X [Polishing] X [Staining]         | [LD] X [Polishing] X [Staining]         | -27.3000               | 26.86488 | 1 | 1.000 |
| [LC] X [No] X [Without staining]         | [LC] X [No] X [Staining]                | 148.0000 <sup>a</sup>  | 26.86488 | 1 | .000  |
| [LC] X [No] X [Without staining]         | [LC] X [Glazing] X [Without staining]   | 15.0000                | 26.86488 | 1 | 1.000 |
| [LC] X [No] X [Without staining]         | [LC] X [Polishing] X [Without staining] | 216.7000 <sup>a</sup>  | 26.86488 | 1 | .000  |
| [LC] X [Glazing] X [Without staining]    | [LC] X [Polishing] X [Without staining] | 201.7000 <sup>a</sup>  | 26.86488 | 1 | .000  |
| [LC] X [No] X [Without staining]         | [LD] X [No] X [Without staining]        | -.5000                 | 26.86488 | 1 | 1.000 |
| [LC] X [Glazing] X [Without staining]    | [LD] X [Glazing] X [Without staining]   | -120.0000 <sup>a</sup> | 26.86488 | 1 | .002  |
| [LC] X [Polishing] X [Without staining]  | [LD] X [Polishing] X [Without staining] | -72.7000               | 26.86488 | 1 | 1.000 |
| [LC] X [No] X [Staining]                 | [LC] X [Glazing] X [Staining]           | 79.4000                | 26.86488 | 1 | .861  |
| [LC] X [No] X [Staining]                 | [LC] X [Polishing] X [Staining]         | 79.4000                | 26.86488 | 1 | .861  |
| [LC] X [Glazing] X [Staining]            | [LC] X [Polishing] X [Staining]         | .0000                  | 26.86488 | 1 | 1.000 |
| [LC] X [No] X [Staining]                 | [LD] X [No] X [Staining]                | -81.0000               | 26.86488 | 1 | .709  |
| [LC] X [Glazing] X [Staining]            | [LD] X [Glazing] X [Staining]           | -194.1000 <sup>a</sup> | 26.86488 | 1 | .000  |
| [LC] X [Polishing] X [Staining]          | [LD] X [Polishing] X [Staining]         | -27.3000               | 26.86488 | 1 | 1.000 |
| [LD] X [No] X [Without staining]         | [LD] X [No] X [Staining]                | 67.5000                | 26.86488 | 1 | 1.000 |
| [LD] X [No] X [Without staining]         | [LD] X [Glazing] X [Without staining]   | 15.5000                | 26.86488 | 1 | 1.000 |
| [LD] X [No] X [Without staining]         | [LD] X [Polishing] X [Without staining] | 217.2000 <sup>a</sup>  | 26.86488 | 1 | .000  |
| [LD] X [Glazing] X [Without staining]    | [LD] X [Polishing] X [Without staining] | 321.7000 <sup>a</sup>  | 26.86488 | 1 | .000  |

|                               |                                 |                       |          |   |       |
|-------------------------------|---------------------------------|-----------------------|----------|---|-------|
| [LD] X [No] X [Staining]      | [LD] X [Glazing] X [Staining]   | -33.7000              | 26.86488 | 1 | 1.000 |
| [LD] X [No] X [Staining]      | [LD] X [Polishing] X [Staining] | 133.1000 <sup>a</sup> | 26.86488 | 1 | .000  |
| [LD] X [Glazing] X [Staining] | [LD] X [Polishing] X [Staining] | 166.8000 <sup>a</sup> | 26.86488 | 1 | .000  |

**Table S2.** Pairwise comparisons to wear depth of dental restorative materials.

| Dental restorative material X<br>Finishing procedure X Staining | Dental restorative material X<br>Finishing procedure X Staining | Mean<br>Difference      | Standard<br>Error | df | Bonferroni<br>Sig. |
|-----------------------------------------------------------------|-----------------------------------------------------------------|-------------------------|-------------------|----|--------------------|
| [5Y-TZP] X [No] X [Without staining]                            | 5Y-TZP] X [No] X [Staining]                                     | -16.1300                | 58.48220          | 1  | 1.000              |
| [5Y-TZP] X [No] X [Without staining]                            | [5Y-TZP] X [Glazing] X [Without staining]                       | 14.5440                 | 58.48220          | 1  | 1.000              |
| [5Y-TZP] X [No] X [Without staining]                            | [5Y-TZP] X [Polishing] X [Without staining]                     | 30.0080                 | 58.48220          | 1  | 1.000              |
| [5Y-TZP] X [Glazing] X [Without staining]                       | [5Y-TZP] X [Polishing] X [Without staining]                     | 15.4640                 | 58.48220          | 1  | 1.000              |
| [5Y-TZP] X [No] X [Without staining]                            | [MCR] X [No] X [Without staining]                               | -1120.9660 <sup>a</sup> | 58.48220          | 1  | .000               |
| [5Y-TZP] X [No] X [Without staining]                            | [LC] X [No] X [Without staining]                                | -528.0690 <sup>a</sup>  | 58.48220          | 1  | .000               |
| [5Y-TZP] X [No] X [Without staining]                            | [LD] X [No] X [Without staining]                                | -340.4020 <sup>a</sup>  | 58.48220          | 1  | .000               |
| [5Y-TZP] X [Glazing] X [Without staining]                       | [MCR] X [Glazing] X [Without staining]                          | -972.3940 <sup>a</sup>  | 58.48220          | 1  | .000               |
| [5Y-TZP] X [Glazing] X [Without staining]                       | [LC] X [Glazing] X [Without staining]                           | -549.9180 <sup>a</sup>  | 58.48220          | 1  | .000               |
| [5Y-TZP] X [Glazing] X [Without staining]                       | [LD] X [Glazing] X [Without staining]                           | -580.0170 <sup>a</sup>  | 58.48220          | 1  | .000               |
| [5Y-TZP] X [Polishing] X [Without staining]                     | [MCR] X [Polishing] X [Without staining]                        | -611.6390 <sup>a</sup>  | 58.48220          | 1  | .000               |
| [5Y-TZP] X [Polishing] X [Without staining]                     | [LC] X [Polishing] X [Without staining]                         | -443.5630 <sup>a</sup>  | 58.48220          | 1  | .000               |
| [5Y-TZP] X [Polishing] X [Without staining]                     | [LD] X [Polishing] X [Without staining]                         | -400.6530 <sup>a</sup>  | 58.48220          | 1  | .000               |
| [5Y-TZP] X [No] X [Staining]                                    | [5Y-TZP] X [Glazing] X [Staining]                               | -37.8140                | 58.48220          | 1  | 1.000              |
| [5Y-TZP] X [No] X [Staining]                                    | [5Y-TZP] X [Polishing] X [Staining]                             | -16.2280                | 58.48220          | 1  | 1.000              |
| [5Y-TZP] X [Glazing] X [Staining]                               | [5Y-TZP] X [Polishing] X [Staining]                             | 21.5860                 | 58.48220          | 1  | 1.000              |
| [5Y-TZP] X [No] X [Staining]                                    | [MCR] X [No] X [Staining]                                       | -788.5811 <sup>a</sup>  | 58.48220          | 1  | .000               |
| [5Y-TZP] X [No] X [Staining]                                    | [LC] X [No] X [Staining]                                        | -418.3860 <sup>a</sup>  | 58.48220          | 1  | .000               |
| [5Y-TZP] X [No] X [Staining]                                    | [LD] X [No] X [Staining]                                        | -383.3020 <sup>a</sup>  | 58.48220          | 1  | .000               |
| [5Y-TZP] X [Glazing] X [Staining]                               | [MCR] X [Glazing] X [Staining]                                  | -1333.1560 <sup>a</sup> | 58.48220          | 1  | .000               |
| [5Y-TZP] X [Glazing] X [Staining]                               | [LC] X [Glazing] X [Staining]                                   | -548.9740 <sup>a</sup>  | 58.48220          | 1  | .000               |
| [5Y-TZP] X [Glazing] X [Staining]                               | [LD] X [Glazing] X [Staining]                                   | -341.8700 <sup>a</sup>  | 58.48220          | 1  | .000               |
| [5Y-TZP] X [Polishing] X [Staining]                             | [MCR] X [Polishing] X [Staining]                                | -787.5091 <sup>a</sup>  | 58.48220          | 1  | .000               |
| [5Y-TZP] X [Polishing] X [Staining]                             | [LC] X [Polishing] X [Staining]                                 | -456.8040 <sup>a</sup>  | 58.48220          | 1  | .000               |
| [5Y-TZP] X [Polishing] X [Staining]                             | [LD] X [Polishing] X [Staining]                                 | -363.4560 <sup>a</sup>  | 58.48220          | 1  | .000               |
| [MCR] X [No] X [Without staining]                               | [MCR] X [No] X [Without staining]                               | 316.2549 <sup>a</sup>   | 58.48220          | 1  | .000               |
| [MCR] X [No] X [Without staining]                               | [MCR] X [Glazing] X [Without staining]                          | 163.1160                | 58.48220          | 1  | 1.000              |
| [MCR] X [No] X [Without staining]                               | [MCR] X [Polishing] X [Without staining]                        | 539.3350 <sup>a</sup>   | 58.48220          | 1  | .000               |
| [MCR] X [Glazing] X [Without staining]                          | [MCR] X [Polishing] X [Without staining]                        | 376.2190 <sup>a</sup>   | 58.48220          | 1  | .000               |
| [MCR] X [No] X [Without staining]                               | [5Y-TZP] X [No] X [Without staining]                            | 1120.9660 <sup>a</sup>  | 58.48220          | 1  | .000               |

|                                          |                                          |                        |          |   |       |
|------------------------------------------|------------------------------------------|------------------------|----------|---|-------|
| [MCR] X [No] X [Without staining]        | [LC] X [No] X [Without staining]         | 592.8970 <sup>a</sup>  | 58.48220 | 1 | .000  |
| [MCR] X [No] X [Without staining]        | [LD] X [No] X [Without staining]         | 780.5640 <sup>a</sup>  | 58.48220 | 1 | .000  |
| [MCR] X [Glazing] X [Without staining]   | [LC] X [Glazing] X [Without staining]    | 422.4760 <sup>a</sup>  | 58.48220 | 1 | .000  |
| [MCR] X [Glazing] X [Without staining]   | [LD] X [Glazing] X [Without staining]    | 392.3770 <sup>a</sup>  | 58.48220 | 1 | .000  |
| [MCR] X [Polishing] X [Without staining] | [LC] X [Polishing] X [Without staining]  | 168.0760               | 58.48220 | 1 | 1.000 |
| [MCR] X [Polishing] X [Without staining] | [LD] X [ Polishing] X [Without staining] | 210.9860               | 58.48220 | 1 | .085  |
| [MCR] X [No] X [Staining]                | [MCR] X [Glazing] X [Staining]           | -582.3889 <sup>a</sup> | 58.48220 | 1 | .000  |
| [MCR] X [No] X [Staining]                | [MCR] X [Polishing] X [Staining]         | -15.1560               | 58.48220 | 1 | 1.000 |
| [MCR] X [Glazing] X [Staining]           | [MCR] X [Polishing] X [Staining]         | 567.2329 <sup>a</sup>  | 58.48220 | 1 | .000  |
| [MCR] X [No] X [Staining]                | [5Y-TZP] X [No] X [Staining]             | 788.5811 <sup>a</sup>  | 58.48220 | 1 | .000  |
| [MCR] X [No] X [Staining]                | [LC] X [No] X [Staining]                 | 370.1951 <sup>a</sup>  | 58.48220 | 1 | .000  |
| [MCR] X [No] X [Staining]                | [LD] X [No] X [Staining]                 | 405.2791 <sup>a</sup>  | 58.48220 | 1 | .000  |
| [MCR] X [Glazing] X [Staining]           | [LC] X [Glazing] X [Staining]            | 784.1820 <sup>a</sup>  | 58.48220 | 1 | .000  |
| [MCR] X [Glazing] X [Staining]           | [LD] X [Glazing] X [Staining]            | 991.2860 <sup>a</sup>  | 58.48220 | 1 | .000  |
| [MCR] X [Polishing] X [Staining]         | [LC] X [Polishing] X [Staining]          | 330.7051 <sup>a</sup>  | 58.48220 | 1 | .000  |
| [MCR] X [Polishing] X [Staining]         | [LD] X [ Polishing] X [Staining]         | 474.6361 <sup>a</sup>  | 58.48220 | 1 | .000  |
| [LC] X [No] X [Without staining]         | [LC] X [No] X [Staining]                 | 93.5530                | 58.48220 | 1 | 1.000 |
| [LC] X [No] X [Without staining]         | [LC] X [Glazing] X [Without staining]    | -7.3050                | 58.48220 | 1 | 1.000 |
| [LC] X [No] X [Without staining]         | [LC] X [Polishing] X [Without staining]  | 114.5140               | 58.48220 | 1 | 1.000 |
| [LC] X [Glazing] X [Without staining]    | [LC] X [Polishing] X [Without staining]  | 121.8190               | 58.48220 | 1 | 1.000 |
| [LC] X [No] X [Without staining]         | [LD] X [No] X [Without staining]         | 187.6670               | 58.48220 | 1 | .368  |
| [LC] X [Glazing] X [Without staining]    | [LD] X [Glazing] X [Without staining]    | -30.0990               | 58.48220 | 1 | 1.000 |
| [LC] X [Polishing] X [Without staining]  | [LD] X [Polishing] X [Without staining]  | 42.9100                | 58.48220 | 1 | 1.000 |
| [LC] X [No] X [Staining]                 | [LC] X [Glazing] X [Staining]            | -168.4020              | 58.48220 | 1 | 1.000 |
| [LC] X [No] X [Staining]                 | [LC] X [Polishing] X [Staining]          | -54.6460               | 58.48220 | 1 | 1.000 |
| [LC] X [Glazing] X [Staining]            | [LC] X [Polishing] X [Staining]          | 113.7560               | 58.48220 | 1 | 1.000 |
| [LC] X [No] X [Staining]                 | [LD] X [No] X [Staining]                 | 35.0840                | 58.48220 | 1 | 1.000 |
| [LC] X [Glazing] X [Staining]            | [LD] X [Glazing] X [Staining]            | 207.1040               | 58.48220 | 1 | .110  |
| [LC] X [Polishing] X [Staining]          | [LD] X [Polishing] X [Staining]          | 143.9310               | 58.48220 | 1 | 1.000 |
| [LD] X [No] X [Without staining]         | [LD] X [No] X [Staining]                 | -59.0300               | 58.48220 | 1 | 1.000 |
| [LD] X [No] X [Without staining]         | [LD] X [Glazing] X [Without staining]    | -225.0710 <sup>a</sup> | 58.48220 | 1 | .033  |
| [LD] X [No] X [Without staining]         | [LD] X [Polishing] X [Without staining]  | -30.2430               | 58.48220 | 1 | 1.000 |
| [LD] X [Glazing] X [Without staining]    | [LD] X [Polishing] X [Without staining]  | 194.8280               | 58.48220 | 1 | .238  |

|                               |                                 |         |          |   |       |
|-------------------------------|---------------------------------|---------|----------|---|-------|
| [LD] X [No] X [Staining]      | [LD] X [Glazing] X [Staining]   | 3.6180  | 58.48220 | 1 | 1.000 |
| [LD] X [No] X [Staining]      | [LD] X [Polishing] X [Staining] | 54.2010 | 58.48220 | 1 | 1.000 |
| [LD] X [Glazing] X [Staining] | [LD] X [Polishing] X [Staining] | 50.5830 | 58.48220 | 1 | 1.000 |
